1 **Comprehensive understanding of population structure and**  
2 **adaptation through graphical representation of gene–**  
3 **environment–trait associations**

4

5

6 Reiichiro Nakamichi<sup>1\*</sup>, Shuichi Kitada<sup>2</sup>, and Hirohisa Kishino<sup>3\*</sup>

7

8

9

10 <sup>1</sup>Japan Fisheries Research & Education Agency, Yokohama 236-8648, Japan; <sup>2</sup>Tokyo

11 University of Marine Science and Technology, Tokyo 108-8477, Japan; <sup>3</sup>Graduate School

12 of Agriculture and Life Sciences, The University of Tokyo, Tokyo 113-8657, Japan.

13

14

15 \*Correspondence: [nakamichi@affrc.go.jp](mailto:nakamichi@affrc.go.jp); [kishino@lbn.ab.a.u-tokyo.ac.jp](mailto:kishino@lbn.ab.a.u-tokyo.ac.jp)

16

17

18 **ABSTRACT**

19 A variable environment affects the physiological states of individuals and, in the long run,  
20 modifies their shapes. These changes, together with geographic barriers, generate  
21 population structure. Here, we propose a graphical representation of significant associations  
22 between genes, environments, and traits. A unique feature of the graph is the node of  
23 genome  $F_{ST}$ . The subnetwork around this node suggests the cause and the effects of  
24 population structure and segregation. A global structure of the graph enables to grasp a  
25 comprehensive picture of adaptation to the environment. Focused look at the neighbors of  
26 the environmental factors identifies the adaptive traits and the genetic background that  
27 supported the adaptation of the traits. Isolated nodes express genetic differentiations that  
28 are not explained by the population structure, implying the presence of some unrecognized  
29 environmental factor. We show the potential usefulness of our graphical representation by a  
30 detailed analysis of public dataset of wild poplar.

31

32 **KEYWORDS**

33  $F_{ST}$ ; environmental adaptation; genome scan; SNPs

34

35

36 Living organisms are adapted to their environment. This environmental adaptation can  
37 create significant differences in phenotypes and traits among populations of a species. For  
38 example, populations of sockeye salmon exhibit diversity in regards to life history traits  
39 such as spawning time and habitat, adult body size and shape, rearing time in freshwater  
40 and seawater, and adaptation to local spawning and rearing habitats within complex lake  
41 systems (Hilborn *et al.* 2003). Populations of walking-stick insects have diverged in body  
42 size, shape, host preference and behavior in parallel with the divergence of their host-plant  
43 species (Nosil *et al.* 2002). Aridity gradients may be the cause of geographically structured  
44 populations of Poaceae characterized by cytotype segregation of diploids and  
45 allotetraploids (Manzaneda *et al.* 2012). When correlated with variation in environmental  
46 factors over local populations, such variation in traits and phenotypes can offer an  
47 opportunity for understanding natural selection processes (Coop *et al.* 2010). Adaptation to  
48 environmental factors can change traits and phenotypes of a species, thereby creating  
49 population structure. Geographical isolation, which can lead to reproductive isolation and  
50 consequent differences in allele frequencies, also contributes to population structuring  
51 (Wright 1965). Population structure needs to be considered when analyzing correlations  
52 among genes, traits and environmental factors across population samples taken from a wide  
53 range of geographical regions.

54

55 Genome-wide association studies (GWASs) are widely used to identify associations  
56 between genes and traits/environments (Visscher *et al.* 2017). When data are obtained from  
57 a metapopulation exhibiting population structure, the effect of genotypes can be inferred by  
58 eliminating population structure effects (Devlin and Roeder 1999) to avoid spurious  
59 associations (Pritchard and Rosenberg 1999). One representative software program,

60 TASSEL (Yu *et al.* 2006; Bradbury *et al.* 2007), performs this type of analysis using a  
61 unified mixed model. Alternatively, associations can be tested in a Hardy-Weinberg  
62 population that has been decomposed from a structured population (Pritchard *et al.* 2000).  
63 Future challenges for large-scale GWASs from wild populations (wild GWASs) include the  
64 development of methods that take population structure into account (Santure and Garant  
65 2018).

66

67 So-called “genome scan methods” consider geographically structured populations and  
68 detect SNPs related to environmental variables, traits and phenotypes (De Mita *et al.* 2013;  
69 De Villemereuil *et al.* 2014). For instance, BayeScan (Foll and Gaggiotti 2008) detects  
70 SNPs that create major differentiation in terms of global  $F_{ST}$  over a metapopulation. As  
71 illustrated in Figure 1A (top), 16 outliers were detected out of 281 SNPs in Atlantic herring  
72 in one study (Limborg *et al.* 2012); these outliers included a SNP in a heat-shock protein  
73 (HSP70) whose allele frequency was negatively correlated with mean sea surface salinities  
74 in spawning grounds (Figure 1A, bottom). As another example, Bayenv (Coop *et al.* 2010)  
75 and the latent factor mixed model (LFMM (Frichot *et al.* 2013)) can detect SNPs that are  
76 highly correlated with environmental factors and traits.

77

78 To obtain a comprehensive picture of population structure and adaptation using related  
79 genes, we propose a novel graphical representation of gene–environment–trait associations.  
80 The graph consists of a set of nodes and edges that connect pairs of nodes with significant  
81 association. Our graph describes correlations among allele frequencies of SNPs, states of  
82 traits, and environmental and location factors. The unique feature of our method is the use  
83 of a genome-wide population differentiation node, which enables inference of the

84 determinants of population structure. Environmental factor nodes around this node may be  
85 the causal force for the population structure, whereas the among-locality variation of  
86 nearby traits may be the result of population differentiation, or vice versa.

87

88 In the conceptual figure of Figure 1B, a location factor, L1, is correlated with E1, an  
89 environmental factor that is correlated in turn with genome  $F_{ST}$ . Two traits, T1 and T2, are  
90 affected by this environmental factor. G4 and G6 are the candidate genes behind the  
91 differentiation of T1. Likewise, G9, G10 and G11 are the candidate genes for T2.

92 Population structure (genome  $F_{ST}$ ) may have differentiated according to some unknown  
93 traits related to G1, G2 and G3, as well as trait T2. By examining the functions of genes G7  
94 and G8, inference of the traits selected by environmental factor E1 may be possible. Of  
95 interest, the hidden factor that differentiates gene G5 can be investigated by plotting the  
96 allele frequencies of G5 relative to location factor L2. In this way, our method provides a  
97 comprehensive perspective for understanding the genetic and ecological mechanisms of  
98 environmental adaptation of a species.

99

## 100 **Materials and Methods**

### 101 *Significance of gene–environment–trait associations*

102 The node of genome  $F_{ST}$  is in the form of a distance matrix between pairs of local  
103 populations. Likewise, all other nodes of SNPs, traits and environmental factors are  
104 represented by matrices whose elements are the differences between pairs of local  
105 populations (Supplementary Figure S1). Consequently, the correlation between a pair of  
106 nodes is the correlation between the between-population distance matrices. The

107 significance of correlation between a pair of nodes is measured by simple linear regression  
108 analysis. Here, the dependent variable is a distance matrix of a node, and the explanatory  
109 variable is the distance matrix of the other node. To take account of correlations in the error  
110 term, we carried out bootstrap resampling of populations and individuals. For each of the  
111 bootstrap datasets, we calculated among-population distance matrices for each node pair,  
112 and obtained the regression coefficient for each node pair. The z value is the ratio of the  
113 original regression coefficient to its bootstrap standard deviation. By applying the  
114 Benjamini-Hochberg method (Benjamini and Hochberg 1995) to these  $p$ -values, we  
115 selected significant correlations with a false discovery rate (FDR) of 0.01. A node pair with  
116 a significant correlation was connected by an edge. We note that these edges represent the  
117 total associations of direct and indirect effects.

118

### 119 *Estimation of pairwise $F_{ST}$*

120 A locus pairwise  $F_{ST}$  at a single marker is the normalized difference of the allele  
121 frequencies and measures the genetic differentiation between a pair of local populations. To  
122 capture the fine-scale population structure even under high gene flow, we adopted an  
123 empirical Bayes estimator using EBFST function of the R package FinePop (Kitada *et al.*  
124 2017). By averaging both numerators and denominators over multiple markers, we obtained  
125 genome  $F_{ST}$ . Genome  $F_{ST}$  indicates the magnitude of population differentiation over the  
126 genome, while locus  $F_{ST}$  indicates the contribution of each gene to population  
127 differentiation.

128

### 129 *Application to wild poplar data*

130 We demonstrate how the graphical representation provides a comprehensive picture of

131 population differentiation and environmental adaptation by analyzing a publicly available  
132 data. It contains genetic and trait information of 445 individuals of wild poplar (*Populus*  
133 *trichocarpa*), which were collected from various regions over a range of 2,500 km, near the  
134 Canadian–US border at a latitude of 44' to 59' N, a longitude of 121' to 138' W, and an  
135 altitude of 0 to 800 m (McKown *et al.* 2014). The data included genotypes of 34,131  
136 SNPs (3,516 genes) and values of stomatal anatomy, leaf tannin, ecophysiology,  
137 morphology and disease. Here, we focused on the four traits: adaxial stomata density  
138 (ADd), abaxial stomata density (ABd), and leaf rust disease morbidity (AUDPC) measured  
139 in 2010 and 2011 (DP10 and DPC11, respectively). Each sampling location was described  
140 by 11 environmental/geographical variables: latitude (lat), longitude (lon), altitude (alt),  
141 longest day length (DAY), frost-free days (FFD), mean annual temperature (MAT), mean  
142 warmest month temperature (MWMT), mean annual precipitation (MAP), mean summer  
143 precipitation (MSP), annual heat-moisture index (AHM) and summer heat-moisture index  
144 (SHM).

145

146 We performed a clustering analysis using the geographical distribution and divided the 445  
147 individuals into subpopulations. We applied model-based clustering (Fraley and Raftery  
148 2016) with three types of spatial information—latitude, longitude and altitude—as the  
149 explanation variables. Using the Bayesian information criterion based on the mclustBIC  
150 function in the R package mclust (Scrucca *et al.* 2016) under the VEV model (ellipsoidal,  
151 equal shape), we obtained 22 subpopulations: 5 in northern British Columbia (NBC), 11 in  
152 southern British Columbia (SBC), 3 in inland British Columbia (IBC) and 3 in Oregon  
153 (ORE).

154

### 155 *Marker screening before analysis of the graphical representation*

156 Because our major concern was identifying correlations between among-population  
157 differentiations of genes, traits and environmental factors, we selected the SNP with the  
158 highest global  $F_{ST}$  value over 22 populations, designated as the tag SNP, from each of the  
159 3,516 gene regions. Out of the 3,516 tag SNPs, only those that were differentiated among  
160 populations were subjected to the graphical representation analysis. We note that the scaled  
161 global  $F_{ST}$  values, calculated as:

$$162 \quad \widetilde{F}_{ST} = \frac{F_{ST}}{\frac{\text{median}(F_{ST})}{k - \frac{2}{3} + \frac{4}{27k} - \frac{8}{729k^2}}}$$

163 approximately follow a chi-squared distribution with degree of freedom  $k$  (= the number of  
164 populations – 1) (Weir and Hill 2002). We performed chi-squared tests on the 3,516 genes  
165 and identified 507 tag SNPs with significant differentiation among populations ( $p < 0.05$ ).

166 Therefore, we used a total of 523 variables: 4 traits, 11 location/environmental factors,  
167 genome  $F_{ST}$  and 507 genes (Supplementary Table S1).

168

## 169 **Results and Discussion**

### 170 *Global structure of the network*

171 Our generated network then identified relationships between genome  $F_{ST}$ , 8 environmental  
172 and 2 location factors, 4 traits and 317 genes (Figure 2A, Supplementary Table S2). The  
173 network consisted of a large cluster centered around genome  $F_{ST}$  along with several  
174 isolated small clusters (Figure 2A, Supplementary Table S2). The location and  
175 environmental factors lat, lon, MAT and DAY were directly connected to genome  $F_{ST}$  in the



176 estimated network, whereas alt was not included in the graph. In contrast, four water-  
177 related factors, MAP, MSP, AHM and SHM, were several steps away from genome  $F_{ST}$ .  
178 Several isolated clusters of genes were present at the boundary of the network. Although  
179 these clusters were differentiated between local populations, the absence of a significant  
180 correlation with genome  $F_{ST}$  implies that the diversity of these traits was not simply the  
181 result of population differentiation, but was instead due to adaptation to the local  
182 environment.

183

#### 184 ***Determinants of population structure***

185 The radius-one neighborhood of genome  $F_{ST}$  suggested that temperature and day length  
186 were the main environmental factors causing population structure, with the observation that  
187 the edges of the graph collected significant correlations (Supplementary Figure S2).  
188 Assisted by the Entrez summaries and GO terms of any genes shown in the graph window,  
189 we found that many genes related to fertility were affected by the population structure  
190 (Supplementary Figure S2, Table S3). An example was SHT (spermidine  
191 hydroxycinnamoyl transferase), which is related to pollen development and pollen exine  
192 formation (Grienenberger *et al.* 2009). The scatter plot visualized in the graph window  
193 provided information that correlated genome  $F_{ST}$  with the SHT gene. Other fertility-related  
194 genes included MYB5 (myb domain protein 5), HAB1 (hyper sensitive to ABA1) and  
195 ACT7 (actin 7) functioning in seed germination (Li *et al.* 2009; Saez *et al.* 2006; Gilliland  
196 *et al.* 2003), AT3G08640 (alphavirus core family protein, DUF3411) and HOG1 (S-  
197 adenosyl-L-homocysteine hydrolase) involved in embryo development (Rocha *et al.* 2005),  
198 LUG (transcriptional corepressor LEUNIG) and VRN1 (AP2/B3-like transcriptional factor  
199 family protein) related to flower development (Conner and Liu 2000; Levy *et al.* 2002) and

200 REV (homeobox-leucine zipper family protein/lipid-binding START domain-containing  
201 protein) associated with flower morphogenesis (Talbert *et al.* 1995).

202

### 203 ***Daylight, latitude, stomatal density and disease***

204 Consistent with McKown et al. (McKown *et al.* 2014), our network confirmed a strong  
205 connection between ADd and disease progress (DP10 and DP11) (Figure 2B). In contrast,  
206 ABd was not directly connected to DPs, but exhibited a strong connection to DAY, as did  
207 DPs. All these nodes were directly connected to genome  $F_{ST}$ .

208

209 Average ADd was constant in the southern region up to 50° N, but increased with latitude  
210 in the northern region (Figure 3A). In contrast, average ABd decreased with latitude in the  
211 northern region (Figure 3B). DAY, which occurs in early summer, increased monotonically  
212 with latitude (Figure 3C), while MAT decreased on average with latitude (Figure 3D). This  
213 result indicates that poplar trees in northern populations experience longer and weaker  
214 sunshine in summer but drop their leaves earlier. Interestingly, the pore size of abaxial  
215 stomata was larger at lower values of ABd (Figure 4A), which demonstrates that northern  
216 populations had larger abaxial stomata, but their density was lower because the leaf area  
217 was limited. In contrast, the large variation in the pore size of adaxial stomata displayed no  
218 relationship with ADd (Figure 4B). The presence of larger stomata causes leaves to have a  
219 lower stomatal density but a greater photosynthetic efficiency (Lawson and Blatt 2014).  
220 These results suggest that northern populations must increase photosynthetic efficiency to  
221 adapt to an environment with weak sunshine and a shorter period before leaf shed. The  
222 increased ADd of northern populations suggests that adaxial stomata compensate for the  
223 decrease in abaxial stomata. Stomatal closure is part of the innate immune response to

224 bacterial invasion (Melotto *et al.* 2006). An increase in abaxial stomata size and adaxial  
225 stomata density might increase the risk of disease invasion. Our results suggest that wild  
226 poplar can expand its habitat northward by increasing photosynthetic capacity while  
227 heightening its risk of disease, although the latter is less significant in northern areas  
228 (McKown *et al.* 2014). This ecological trade-off may be a cause of the population structure  
229 of wild poplar.

230

### 231 ***Photosynthesis and circadian rhythm in response to day length***

232 Geraldès *et al.* (Geraldès *et al.* 2014) have identified a large number of  $F_{ST}$  outliers that are  
233 overrepresented in genes involved in circadian rhythm and response to red/far-red light. In  
234 our graph, the allele frequencies of genes related to photosynthesis and the circadian cycle  
235 were found to be influenced by day length (Figure 5, Supplementary Table S4). For  
236 example, ACT7 (actin 7) is related to response to light stimulus (McDowell *et al.* 1996),  
237 and its allele frequencies were negatively correlated with DAY and lon (Figure 5, lower  
238 left). Geographical mapping of ACT7 allele frequencies and day length confirmed this  
239 correlation (Figure 6A). Other genes included PRR7 (pseudo-response regulator 7) and  
240 TOC1 (CCT motif-containing response regulator protein) related to circadian rhythm (Farré  
241 *et al.* 2005; Alabadí *et al.* 2001), APX2 (ascorbate peroxidase 2) associated with response  
242 to high light intensity and response to oxidative stress (Karpinski *et al.* 1997), EXPA1  
243 (expansin A1) involved in response to red light (Esmon *et al.* 2006) and SUS4 (sucrose  
244 synthase 4) related to the carbon assimilation process (Bieniawska *et al.* 2007). These  
245 results suggest that day length is the most important factor controlling photosynthesis and  
246 that latitude causes differentiation of photosynthetic genes. Finally, the allele frequencies of  
247 SYP121 (syntaxin of plant 121) related to stomatal movement (Bassham and Blatt 2008)

248 and PIP3 (plasma membrane intrinsic protein 3) participating in response to abscisic acid  
249 and water channel activity (Weig *et al.* 1997) were also significantly correlated with day  
250 length (figures not shown).

251

252 ***Damage response, the circadian system and stomata related to disease susceptibility***

253 Morbidity due to leaf rust disease (DP10 and DP11) showed a close relationship to adaxial  
254 stomatal density (ADd) and day length (DAY) (Figs. 2B and 5, Supplementary Table S5).  
255 Genes closely connected to DAY, such as ACT7 (related to response to wounding), PRR7,  
256 APX2 and PIP3, were also closely linked to morbidity. Other genes, namely, FHY3 (far-red  
257 elongated hypocotyls 3) related to circadian rhythm (Allen *et al.* 2006) and DRT100 (DNA-  
258 damage repair/tolerant 100) functioning in DNA repair (Pang *et al.* 1993), also were  
259 involved in this cluster. Because the DAY-related genes control stomatal opening and  
260 closing, our subgraph (Figure 5) suggests that fungal invasion into tissues occurs through  
261 stomata (Melotto *et al.* 2006). SHT (spermidine hydroxycinnamoyl transferase) was closely  
262 connected to leaf rust disease morbidity. As described above, SHT is related to pollen  
263 development and connected to genome  $F_{ST}$ . In addition, spermidine is known as a  
264 modulator of the immune process (Theoharides 1980). This result thus implies that the  
265 functions of SHT in immune and reproduction play important roles in population  
266 differentiation and adaptation through disease resistance. DRT100 allele frequencies were  
267 negatively correlated with DP11 (figure not shown), and the geographical gradients of  
268 DRT100 allele frequencies and DP11 well explained the correlation (Supplementary Figure  
269 S3A). This result suggests that leaf rust disease affects fertility and promotes population  
270 differentiation. Principal component analysis using these genes, which were neighbors of  
271 ADd, DP10 and DP11, clearly revealed differences in morbidity between locations from

272 north to south (Supplementary Figure S4). This result implies that the phenotypes  
273 controlled by circadian and light-responsive genes have adapted to local environments  
274 according to latitude and day length and are responsible for the morbidity-related  
275 population differentiation.

276

### 277 ***Body growth affected by temperature***

278 Genes in the subgraph around MAT and FFD were those involved in shoot development  
279 (Supplementary Figure S5, Table S6), such as LAS (lateral suppressor, GRAS family  
280 transcription factor) related to secondary shoot formation (Greb *et al.* 2003) and REV  
281 (homeobox-leucine zipper family protein/lipid-binding START domain-containing protein)  
282 linked to primary shoot apical meristem specification and leaf morphogenesis. LAS allele  
283 frequencies were negatively correlated with MAT (Supplementary Figure S5, lower left).  
284 The geographical gradients of LAS allele frequencies and MAT supported this correlation  
285 (Supplementary Figure S3b). These results imply that temperature strongly supports body  
286 growth of poplar.

287

### 288 ***Drought stress resistance depends on water conditions***

289 The environmental factors MAP, MSP, AHM and SHM exhibited no direct connection to  
290 genome  $F_{ST}$  (Figure 2A, Supplementary Figure S6, Table S7). An indirect connection was  
291 apparent, however, through genes with functions related to water stress. These genes were  
292 XERICO (RING/U-box superfamily protein), HK2 (histidine kinase 2) and ABA1 (ABA  
293 deficient 1, zeaxanthin epoxidase) involved in response to osmotic stress and response to  
294 salt stress (Ko *et al.* 2006; Tran *et al.* 2007; Xiong *et al.* 2002), CBF4 (C-repeat binding  
295 factor 4) related to response to drought (Haake *et al.* 2002) and AGP14 (arabinogalactan

296 protein 14) participating in root hair elongation (Lin *et al.* 2011). A close examination of  
297 CBF4, directly connected to AHM, revealed that its allele frequencies were negatively  
298 correlated with AMH and clustered by geographical groups (Supplementary Figure S6,  
299 lower left). CBF4 allele frequencies were particularly differentiated in IBC where AHM  
300 was high (Figure 6B). This result suggests that the CBF4 gene has differentiated as an  
301 adaptive response to dry weather. The apparent weak relationship between water stress and  
302  $F_{ST}$  may be a consequence of the relatively small differences in water conditions in this  
303 dataset.

304

### 305 ***Vernalization depends on some unknown environmental conditions***

306 Several isolated gene clusters, which were unconnected to genome  $F_{ST}$ , environmental  
307 factors or traits, appeared in the global network (Figure 2A). Each cluster contained genes  
308 whose functions were strongly related. For example, the largest isolated cluster consisted of  
309 vernalization genes (Supplementary Figure S7, Table S8), such as FUS6 related to  
310 regulation of flower development and seed germination (Chory *et al.* 1996), GA3OX1  
311 associated with response to gibberellin and response to red light (McGinnis *et al.* 2003) and  
312 VRN1 linked to vernalization response and regulation of flower development. Although  
313 these genes may not be directly responsible for population structure, the appearance of the  
314 isolated cluster in the network implies a latent relationship between vernalization and  
315 population differentiation. In regards to the geographical distribution of their allele  
316 frequencies, FUS6 and GA3OX1 had similar, complicated patterns (Figure 6C,  
317 Supplementary Figure S3C). Populations in SBC and eastern IBC had a similar pattern of  
318 allele frequencies, while those in northern NBC, southern ORE and western IBC displayed  
319 a different pattern. This result may imply an adaptation to a microenvironment not observed

320 in this data. For example, the direction of a mountain slope can create different habitats  
321 with different daylight conditions.

322

### 323 ***Gene ontology enrichment analysis***

324 No significant GOs were predicted by gene ontology enrichment analysis (Subramanian *et*  
325 *al.* 2005; Alexa *et al.* 2006) for the union of the set of 317 genes selected for the graph and  
326 the sets of neighboring genes mentioned above relative to the other complementary gene  
327 sets. To obtain a comprehensive picture based on solid evidence, we focused on  
328 geographically differentiating SNPs and selected pairs of nodes by controlling FDR. As a  
329 consequence, we may have diminished the ability to identify differences between the two  
330 sets of genes. Alternatively, mutations in a few members of the relevant pathways may have  
331 enabled adaptation to the variable environments.

332

333 Our method identifies genes related to environmental adaptation with a FDR of 1% and  
334 visualizes their network, including genome  $F_{ST}$ , environmental and location factors, and  
335 traits. Our example using wild poplar has revealed the potential of our graphical model  
336 representation to aid comprehensive understanding of ecological and genetic mechanisms  
337 underlying environmental adaptation and population structuring. While conventional  
338 GWAS and genome scanning effectively search for genes related to some given factors or  
339 traits, our method captures the overall picture of the relationship among genes,  
340 environmental factors and traits in association with population structure. By following the  
341 sub-network of genes around target environmental factors and traits, we can obtain a  
342 detailed understanding of the relationship of genes behind environmental adaptation and

343 population differentiation. In particular, detection of collaboratively adapted gene clusters,  
344 which are not directly associated with the given environment/trait factors, is an advantage  
345 of our graphical representation. Our R software module GET.graph aids this process by  
346 displaying subgraphs and scatter plots of allele frequencies of genes vs. environmental  
347 factors/traits. GET.graph retains the biological functions of genes retrieved from public  
348 databases, such as GO and ENTREZ, and helps us smoothly interpret the graph. Through  
349 this process, we can reach comprehensive understanding of population structure and  
350 adaptation by characterizing the sub-networks of the graph (Figure 2a).

351

352 Our graph collects significant correlations that sum up both direct and indirect  
353 relationships, while partial correlations extract direct relationships (Kishino and Waddell  
354 2000; De La Fuente *et al.* 2004; Liu 2013). Collection of significant partial correlations in  
355 this setting is left for future study. Finally, we must be aware of computational feasibility.  
356 The calculation load greatly increases depending on the number of variables and is roughly  
357 proportional to the square of the number of variables. The analysis for this paper took  
358 several hours on an Intel Core i7 (6 core) workstation. The above step of prescreening  
359 variables is therefore indispensable. As a final remark, the data, especially genomic data,  
360 often include missing values. Our graphical representation method describes relationships  
361 between population means of allele frequencies, trait values and environmental/location  
362 factors; therefore, like Bayenv (Coop *et al.* 2010), it analyzes sample means among  
363 measured data. As long as the means of measured allele/environmental/trait variables are  
364 unbiased estimates of the corresponding sample means, the procedure is also unbiased.

365

366 The R software module (GET.graph) that implements the network analysis described in this



367 paper is available in the FinePop package at CRAN ([https://CRAN.R-](https://CRAN.R-project.org/package=FinePop)  
368 [project.org/package=FinePop](https://CRAN.R-project.org/package=FinePop)).

369

## 370 **Acknowledgements**

371 This study was supported by the Japan Society for the Promotion of Science Grant-in-Aid  
372 for Scientific Research 25280006 and 16H02788 to HK and 18K05781 to SK.

373

## 374 **Literature Cited**

375 Alabadí, D., T. Oyama, M. J. Yanovsky, F. G. Harmon, P. Más *et al.*, 2001

376 Reciprocal regulation between TOC1 and LHY/CCA1 within the  
377 Arabidopsis circadian clock. *Science* 293: 880–883.

378 <https://doi.org/10.1126/science.1061320>

379 Alexa, A., J. Rahnenführer, and T. Lengauer, 2006 Improved scoring of

380 functional groups from gene expression data by decorrelating GO graph  
381 structure. *Bioinformatics* 22: 1600–1607.

382 <https://doi.org/10.1093/bioinformatics/btl140>

383 Allen, T., A. Koustenis, G. Theodorou, D. E. Somers, S. A. Kay *et al.*, 2006

384 Arabidopsis FHY3 specifically gates phytochrome signaling to the  
385 circadian clock. *Plant Cell* 18: 2506–2516.

386 <https://doi.org/10.1105/tpc.105.037358>

387 Bassham, D. C., and M. R. Blatt, 2008 SNAREs: cogs and coordinators in

388 signaling and development. *Plant Physiol.* 147: 1504–1515.

389 <https://doi.org/10.1104/pp.108.121129>

- 390 Benjamini, Y., and Y. Hochberg, 1995 Controlling the false discovery rate: a  
391 practical and powerful approach to multiple testing. *J. Royal Stat. Soc.* 57:  
392 289–300. <https://doi.org/10.2307/2346101>
- 393 Bieniawska, Z., D. H. Paul Barratt, A. P. Garlick, V. Thole, N. J. Kruger *et al.*,  
394 2007 Analysis of the sucrose synthase gene family in Arabidopsis. *Plant J.*  
395 49: 810–828. <https://doi.org/10.1111/j.1365-313X.2006.03011.x>
- 396 Bradbury, P. J., Z. Zhang, D. E. Kroon, T. M. Casstevens, Y. Ramdoss *et al.*,  
397 2007 TASSEL: software for association mapping of complex traits in  
398 diverse samples. *Bioinformatics* 23: 2633–2635.  
399 <https://doi.org/10.1093/bioinformatics/btm308>
- 400 Chory, J., M. Chatterjee, R. K. Cook, T. Elich, C. Fankhauser *et al.*, 1996 From  
401 seed germination to flowering, light controls plant development via the  
402 pigment phytochrome. *Proc. Natl. Acad. Sci.* 93: 12066-12071.  
403 <https://doi.org/10.1073/pnas.93.22.12066>
- 404 Conner, J., and Z. Liu, 2000 LEUNIG, a putative transcriptional corepressor  
405 that regulates AGAMOUS expression during flower development. *Proc.*  
406 *Natl. Acad. Sci.* 97: 12902-12907. <https://doi.org/10.1073/pnas.230352397>
- 407 Coop, G. D., D. Witonsky, A. Di Rienzo, and K. J. Pritchard, 2010 Using  
408 environmental correlations to identify loci underlying local adaptation.  
409 *Genetics* 185: 1411–1423. <https://doi.org/10.1534/genetics.110.114819>
- 410 De La Fuente, A., N. Bing, I. Hoeschele, and P. Mendes, 2004 Discovery of  
411 meaningful associations in genomic data using partial correlation

- 412 coefficients. *Bioinformatics* 20: 3565–3574.  
413 <https://doi.org/10.1093/bioinformatics/bth445>
- 414 De Mita, S., A. C. Thuillet, L. Gay, N. Ahmadi, S. Manel *et al.*, 2013 Detecting  
415 selection along environmental gradients: analysis of eight methods and  
416 their effectiveness for outbreeding and selfing populations. *Mol. Ecol.* 22:  
417 1383–1399. <https://doi.org/10.1111/mec.12182>
- 418 De Villemereuil, P., É. Frichot, É. Bazin, O. François, and O. E. Gaggiotti, 2014  
419 Genome scan methods against more complex models: when and how much  
420 should we trust them? *Mol. Ecol.* 23: 2006–2019.  
421 <https://doi.org/10.1111/mec.12705>
- 422 Devlin, B., and K. Roeder, 1999 Genomic control for association studies.  
423 *Biometrics* 55: 997–1004. <https://doi.org/10.1111/j.0006-341X.1999.00997.x>
- 424 Esmon, C. A., A. G. Tinsley, K. Ljung, G. Sandberg, L. B. Hearne *et al.*, 2006 A  
425 gradient of auxin and auxin-dependent transcription precedes tropic  
426 growth responses. *Proc. Natl. Acad. Sci.* 103: 236–241.  
427 <https://doi.org/10.1073/pnas.0507127103>
- 428 Farré, E. M., H. S. L. F. Harmon, M. J. Yanovsky, and S. A. Kay, 2005  
429 Overlapping and distinct roles of PRR7 and PRR9 in the Arabidopsis  
430 circadian clock. *Curr. Biol.* 15: 47–54.  
431 <https://doi.org/10.1016/j.cub.2004.12.067>
- 432 Foll, M., and O. Gaggiotti, 2008 A genome scan method to identify selected loci  
433 appropriate for both dominant and codominant markers: a Bayesian

- 434 perspective. *Genetics* 180: 977-993.
- 435 <https://doi.org/10.1534/genetics.108.092221>
- 436 Fraley, C., and A. E. Raftery, 2016 Model-based clustering, discriminant  
437 analysis and density estimation. *BMC Bioinformatics* 17: 287.
- 438 <https://doi.org/10.1198/016214502760047131>
- 439 Frichot, E., S. D. Schoville, G. Bouchard, and O. François, 2013 Testing for  
440 associations between loci and environmental gradients using latent factor  
441 mixed models. *Mol. Biol. Evol.* 30: 1687–1699.
- 442 <https://doi.org/10.1093/molbev/mst063>
- 443 Geraldès, A., N. Farzaneh, C. J. Grassa, A. D. McKown, R. D. Guy *et al.*, 2014  
444 Landscape genomics of *Populus trichocarpa* the role of hybridization  
445 limited gene flow and natural selection in shaping patterns of population  
446 structure. *Evolution* 68: 3260–3280. <https://doi.org/10.1111/evo.12497>
- 447 Gilliland, L. U., L. C. Pawloski, M. K. Kandasamy, and R. B. Meagher, 2003  
448 *Arabidopsis* actin gene ACT7 plays an essential role in germination and  
449 root growth. *Plant J.* 33: 319–328. [https://doi.org/10.1046/j.1365-](https://doi.org/10.1046/j.1365-313X.2003.01626.x)  
450 [313X.2003.01626.x](https://doi.org/10.1046/j.1365-313X.2003.01626.x)
- 451 Greb, T., O. Clarenz, E. Schäfer, D. Müller, R. Herrero *et al.*, 2003 Molecular  
452 analysis of the LATERAL SUPPRESSOR gene in *Arabidopsis* reveals a  
453 conserved control mechanism for axillary meristem formation. *Genes Dev.*  
454 17: 1175–1187. <https://doi.org/10.1101/gad.260703>
- 455 Grienemberger, E., S. Besseau, P. Geoffroy, D. Debayle, D. Heintz *et al.*, 2009 A  
456 BAHD acyltransferase is expressed in the tapetum of *Arabidopsis* anthers

457 and is involved in the synthesis of hydroxycinnamoyl spermidines. *Plant J.*  
458 58: :246–259. <https://doi.org/10.1111/j.1365-313X.2008.03773.x>

459 Haake, V., D. Cook, J. L. Riechmann, O. Pineda, M. F. Thomashow *et al.*, 2002  
460 Transcription factor CBF4 is a regulator of drought adaptation in  
461 *Arabidopsis*. *Plant Physiol.* 130: 639–648. <https://doi.org/10.1104/pp.006478>

462 Hilborn, R., T. P. Quinn, D. E. Schindler, and D. E. Rogers, 2003 Biocomplexity  
463 and fisheries sustainability. *Proc. Natl. Acad. Sci.* 100: 6564–6568.  
464 <https://doi.org/10.1073/pnas.1037274100>

465 Karpinski, S., C. Escobar, B. Karpinska, G. Creissen, and P. M. Mullineaux,  
466 1997 Photosynthetic electron transport regulates the expression of  
467 cytosolic ascorbate peroxidase genes in *Arabidopsis* during excess light  
468 stress. *Plant Cell* 9: 627–640. <https://doi.org/10.1105/tpc.9.4.627>

469 Kishino, H., and P. J. Waddell, 2000 Correspondence analysis of genes and  
470 tissue types and finding genetic links from microarray data. *Genome*  
471 *Inform Ser Workshop Genome Inform.* 11: 83–95.

472 Kitada, S., R. Nakamichi, and H. Kishino, 2017 The empirical Bayes estimators  
473 of fine-scale population structure in high gene flow species. *Mol. Ecol.*  
474 *Resour.* 17: 1210–1222. <https://doi.org/10.1111/1755-0998.12663>

475 Ko, J. H., S. H. Yang, and K. H. Han, 2006 Upregulation of an *Arabidopsis*  
476 RING-H2 gene, XERICO, confers drought tolerance through increased  
477 abscisic acid. *Plant J.* 47: 343–355. [https://doi.org/10.1111/j.1365-](https://doi.org/10.1111/j.1365-313X.2006.02782.x)  
478 [313X.2006.02782.x](https://doi.org/10.1111/j.1365-313X.2006.02782.x)

- 479 Lawson, T., and M. R. Blatt, 2014 Stomatal size, speed, and responsiveness  
480 impact on photosynthesis and water use efficiency. *Plant Physiol.* 164:  
481 1556–1570. <https://doi.org/10.1104/pp.114.237107>
- 482 Levy, Y. Y., S. Mesnage, J. S. Mylne, A. R. Gendall, and C. Dean, 2002 Multiple  
483 roles of *Arabidopsis* VRN1 in vernalization and flowering time control.  
484 *Science* 297: 243–246. <https://doi.org/10.1126/science.1072147>
- 485 Li, S. F., O. N. Milliken, H. Pham, R. Seyit, R. Napoli *et al.*, 2009 The  
486 *Arabidopsis* MYB5 transcription factor regulates mucilage synthesis, seed  
487 coat development, and trichome morphogenesis. *Plant Cell* 21: 72–89.  
488 <https://doi.org/10.1105/tpc.108.063503>
- 489 Limborg, M. T., S. J. Helyar, M. De Bruyn, M. I. Taylor, E. E. Nielsen *et al.*,  
490 2012 Environmental selection on transcriptome - derived SNPs in a high  
491 gene flow marine fish, the Atlantic herring (*Clupea harengus*). *Mol. Ecol.*  
492 21: 3686–3703. <https://doi.org/10.1111/j.1365-294X.2012.05639.x>
- 493 Lin, W. D., Y. Y. Liao, T. J. Yang, C. Y. Pan, T. J. Buckhout *et al.*, 2011  
494 Coexpression-based clustering of *Arabidopsis* root genes predicts functional  
495 modules in early phosphate deficiency signaling. *Plant Physiol.* 155: 1383–  
496 1402. <https://doi.org/10.1104/pp.110.166520>
- 497 Liu, W., 2013 Gaussian graphical model estimation with false discovery rate  
498 control. *Ann. Stat.* 41: 2948–2978. <https://doi.org/10.1214/13-AOS1169>
- 499 Manzaneda, A. J., P. J. Rey, J. M. Bastida, C. Weiss-Lehman, E. Raskin *et al.*,  
500 2012 Environmental aridity is associated with cytotype segregation and

- 501 polyploidy occurrence in *Brachypodium distachyon* (Poaceae). *New Phytol.*  
502 193: 797–805. <https://doi.org/10.1111/j.1469-8137.2011.03988.x>
- 503 McDowell, L. M., Y. An, S. Huang, E. C. McKinney, and R. B. Meagher, 1996  
504 The *Arabidopsis* ACT7 actin gene is expressed in rapidly developing tissues  
505 and responds to several external stimuli. *Plant Physiol.* 111: 699–711.  
506 <https://doi.org/10.1104/pp.111.3.699>
- 507 McGinnis, K. M., S. G. Thomas, J. D. Soule, L. C. Strader, J. M. Zale *et al.*,  
508 2003 The *Arabidopsis* SLEEPY1 gene encodes a putative F-Box subunit of  
509 an SCF E3 ubiquitin ligase. *Plant Cell* 15: 1120–1130.  
510 <https://doi.org/10.1105/tpc.010827>
- 511 McKown, A. D., R. D. Guy, L. Quamme, J. Klápště, J. La Mantia *et al.*, 2014  
512 Association genetics, geography and ecophysiology link stomatal  
513 patterning in *Populus trichocarpa* with carbon gain and disease resistance  
514 trade-offs. *Mol. Ecol.* 23: 5771–5790. <https://doi.org/10.1111/mec.12969>
- 515 Melotto, M., W. Underwood, J. Koczan, K. Nomura, and S. Y. He, 2006 *Plant*  
516 stomata function in innate immunity against bacterial invasion. *Cell* 126:  
517 969–98. <https://doi.org/10.1016/j.cell.2006.06.054>
- 518 Nosil, P., B. J. Crespi, and C. P. Sandoval, 2002 Host-plant adaptation drives  
519 the parallel evolution of reproductive isolation. *Nature* 417: 440–443.  
520 <https://doi.org/10.1038/417440a>
- 521 Pang, Q., J. B. Hays, I. Rajagopal, and T. S. Schaefer, 1993 Selection of  
522 *Arabidopsis* cDNAs that partially correct phenotypes of *Escherichia coli*  
523 DNA-damage-sensitive mutants and analysis of two plant cDNAs that

524 appear to express UV-specific dark repair activities. *Plant Mol. Biol.* 22:  
525 411–426. <https://doi.org/10.1007/BF00015972>

526 Pritchard, J. K., and N. A. Rosenberg, 1999 Use of unlinked genetic markers to  
527 detect population stratification in association studies. *Am. J. Hum. Genet.*  
528 65: 220–228. <https://doi.org/10.1086/302449>

529 Pritchard, J. K., M. Stephens, N. A. Rosenberg, and P. Donnelly, 2000  
530 Association mapping in structured populations. *Am. J. Hum. Genet.* 67:  
531 170–181. <https://doi.org/10.1086/302959>

532 Rocha, P. S., M. Sheikh, R. Melchiorre, M. Fagard, S. Boutet *et al.*, 2005 The  
533 *Arabidopsis* HOMOLOGY-DEPENDENT GENE SILENCING1 gene codes  
534 for an S-adenosyl-L-homocysteine hydrolase required for DNA  
535 methylation-dependent gene silencing. *Plant Cell* 17: 404–417.  
536 <https://doi.org/10.1105/tpc.104.028332>

537 Saez, A., N. Robert, M. H. Maktabi, J. I. Schroeder, R. Serrano *et al.*, 2006  
538 Enhancement of abscisic acid sensitivity and reduction of water  
539 consumption in *Arabidopsis* by combined inactivation of the protein  
540 phosphatases type 2C ABI1 and HAB1. *Plant Physiol.* 141: 1389–1399.  
541 <https://doi.org/10.1104/pp.106.081018>

542 Santure, A. W., and D. Garant, 2018 Wild GWAS - association mapping in  
543 natural populations. *Mol. Ecol. Resour.* 18: 729–738.  
544 <https://doi.org/10.1111/1755-0998.12901>



- 545 Scrucca, L., M. Fop, T. B. Murphy, and A. E. Raftery, 2016 mclust 5: clustering,  
546 classification and density estimation using Gaussian finite mixture  
547 models. *R J.* 8: 205–233.
- 548 Subramanian, A., P. Tamayo, V. K. Mootha, S. Mukherjee, B. L. Ebert *et al.*,  
549 2005 Gene set enrichment analysis: a knowledge-based approach for  
550 interpreting genome-wide expression profiles. *Proc. Natl. Acad. Sci.* 102:  
551 15545–15550. <https://doi.org/10.1073/pnas.0506580102>
- 552 Talbert, P. B., H. T. Adler, D. W. Parks, and L. Comai, 1995 The REVOLUTA  
553 gene is necessary for apical meristem development and for limiting cell  
554 divisions in the leaves and stems of *Arabidopsis thaliana*. *Development*  
555 121: 2723–2735.
- 556 Theoharides, T. C., 1980 Polyamines spermidine and spermine as modulators of  
557 calcium-dependent immune processes. *Life Sci.* 27: 703–713.  
558 [https://doi.org/10.1016/0024-3205\(80\)90323-9](https://doi.org/10.1016/0024-3205(80)90323-9)
- 559 Tran, L. S., T. Urao, F. Qin, K. Maruyama, T. Kakimoto *et al.*, 2007 Functional  
560 analysis of AHK1/ATHK1 and cytokinin receptor histidine kinases in  
561 response to abscisic acid, drought, and salt stress in *Arabidopsis*. *Proc.*  
562 *Natl. Acad. Sci.* 104: 20623–20628.  
563 <https://doi.org/10.1073/pnas.0706547105>
- 564 Visscher, P. M., N. R. Wray, Q. Zhang, P. Sklar, M. I. McCarthy *et al.*, 2017 10  
565 years of GWAS discovery: biology, function, and translation. *Am. J. Hum.*  
566 *Genet.* 101: 5–22. <https://doi.org/10.1016/j.ajhg.2017.06.005>

- 567 Weig, A., C. Deswarte, and M. J. Chrispeels, 1997 The major intrinsic protein  
568 family of Arabidopsis has 23 members that form three distinct groups with  
569 functional aquaporins in each group. *Plant Physiol.* 114: 1347–1357.  
570 <https://doi.org/10.1104/pp.114.4.1347>
- 571 Weir, B. S., and W. G. Hill, 2002 Estimating F-statistics. *Annu. Rev. Genet.* 36:  
572 721–750. <https://doi.org/10.1146/annurev.genet.36.050802.093940>
- 573 Wright, S., 1965 The interpretation of population structure by F - statistics  
574 with special regard to systems of mating. *Evolution* 19: 395–420.  
575 <https://doi.org/10.2307/2406450>
- 576 Xiong, L., H. Lee, M. Ishitani, and J. K. Zhu, 2002 Regulation of osmotic stress-  
577 responsive gene expression by the LOS6/ABA1 locus in Arabidopsis. *J.*  
578 *Biol. Chem.* 277: 8588-8596. <https://doi.org/10.1074/jbc.M109275200>
- 579 Yu, J., G. Pressoir, W. H. Briggs, I. Vroh Bi, M. Yamasaki *et al.*, 2006 A unified  
580 mixed-model method for association mapping that accounts for multiple  
581 levels of relatedness. *Nat. Genet.* 38: 203–208.  
582 <https://doi.org/10.1038/ng1702>
- 583

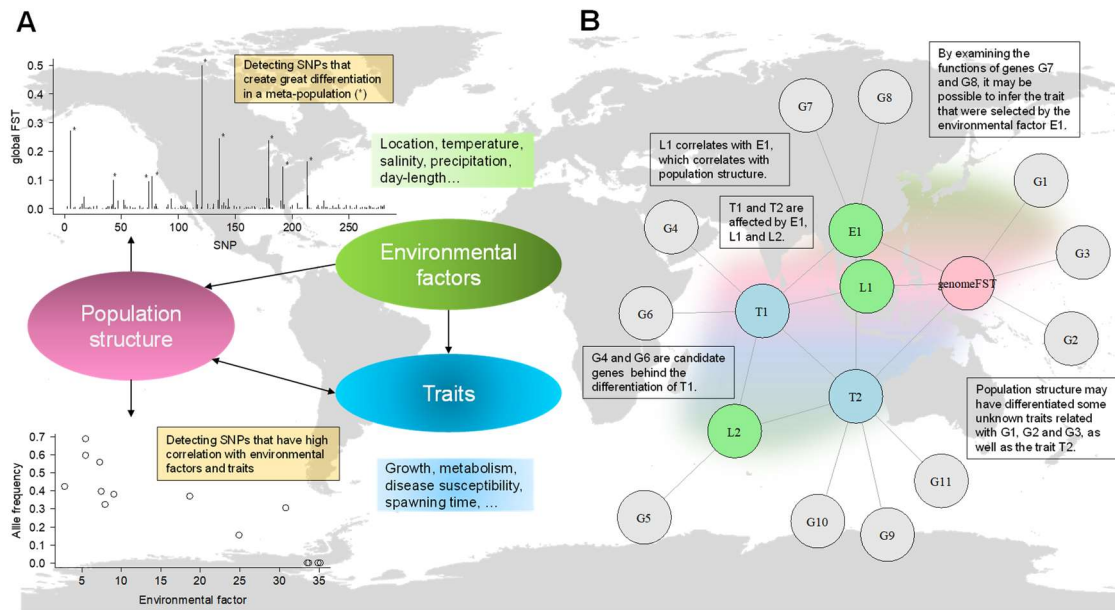

**Figure 1** Conceptual diagram of the detection of genes controlling environmental adaptation. (A) Representative genome scan methods. (B) A network-based method enabling comprehensive understanding of environmental adaptation of traits and genes that leads to population structure. E, environmental factors, such as temperature, daylength, precipitation and salinity. L, location factors, such as longitude, latitude, altitude and geographical distance. T, traits such as height, size, metabolism, disease susceptibility and reproductive season.

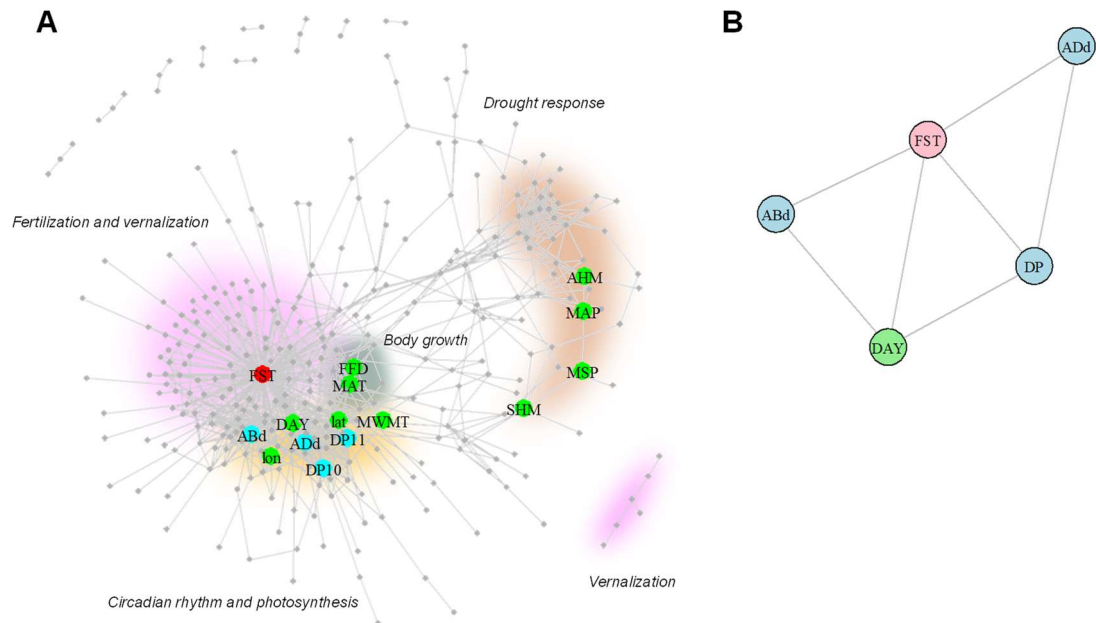

**Figure 2** Whole network graph of the environmental adaptation of wild poplar. The red circle indicates population differentiation in terms of genome  $F_{ST}$ ; green circles are environmental and location factors, blue ones are traits, and gray dots are genes. (A) Global structure of the estimated network. Colored clouds show clusters of genes with similar functions. (B) Relationship between  $F_{ST}$ , abaxial/adaxial stomata density (ABd and ADd), day length (DAY) and morbidity (DP10 and DP11).

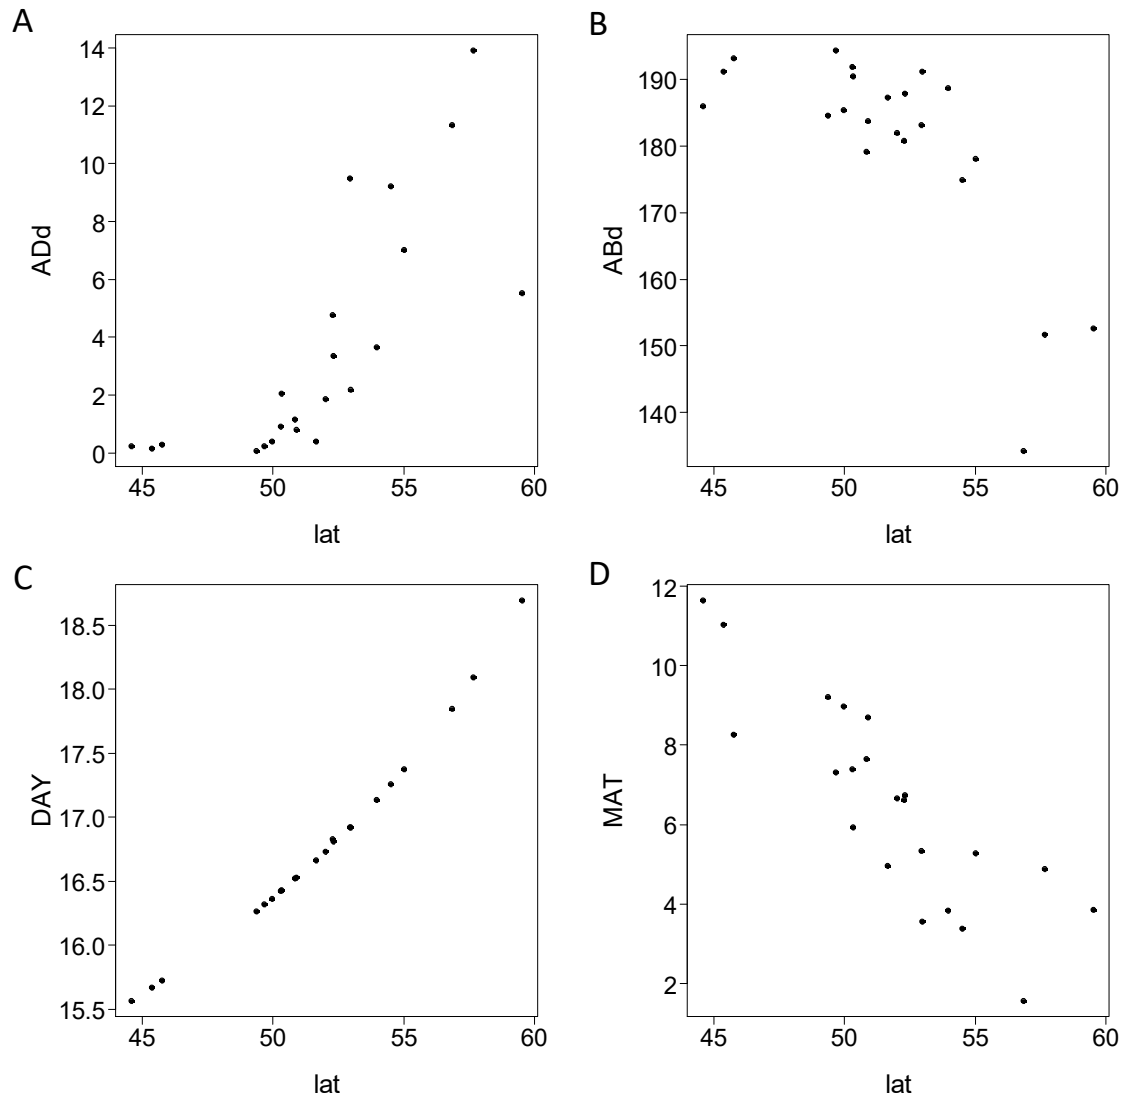

**Figure 3** Geographic distribution of stomatal density of wild poplar, day length and temperature. (A) Latitude (lat) vs. adaxial stomata density (ADd). (B) lat vs. abaxial stomata density (ABd). (C) lat vs. longest day length (DAY). (D) lat vs. mean annual temperature (MAT).

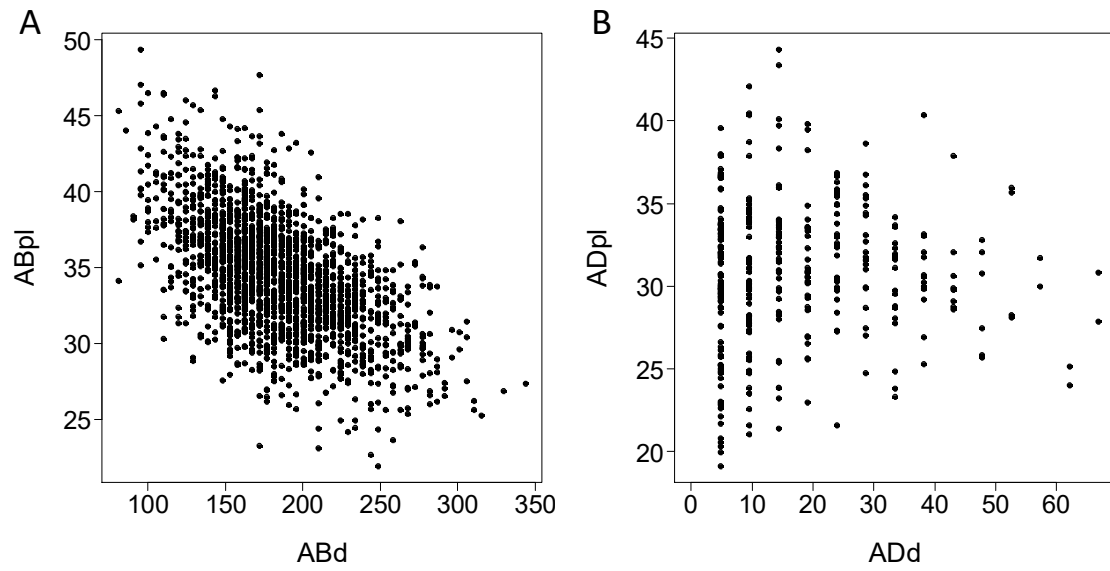

**Figure 4** Stomatal density and pore size of wild poplar. (A) Abaxial stomata density (ABd) vs pore length (ABpl). (B) Adaxial stomata density (ADd) vs pore length (ADpl).

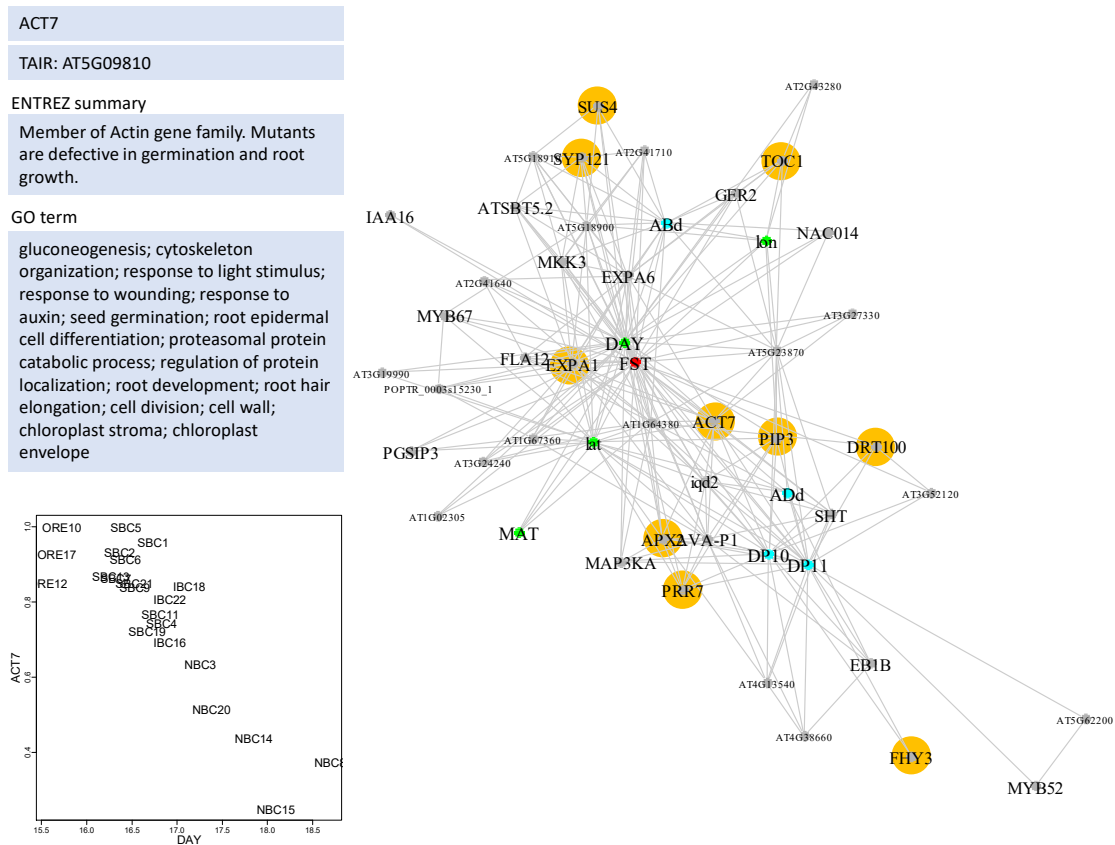

**Figure 5** Radius-one neighborhood of longest day length (DAY) and disease progress (DP10 and DP11). The biological functions (upper left) of genes in the neighborhood and their correlations (lower left) with the center node can be seamlessly examined by entering a gene name in the upper left text box. In this example, ACT7 was examined (left), and genes related to photosynthesis and circadian rhythm are colored in orange (see text).

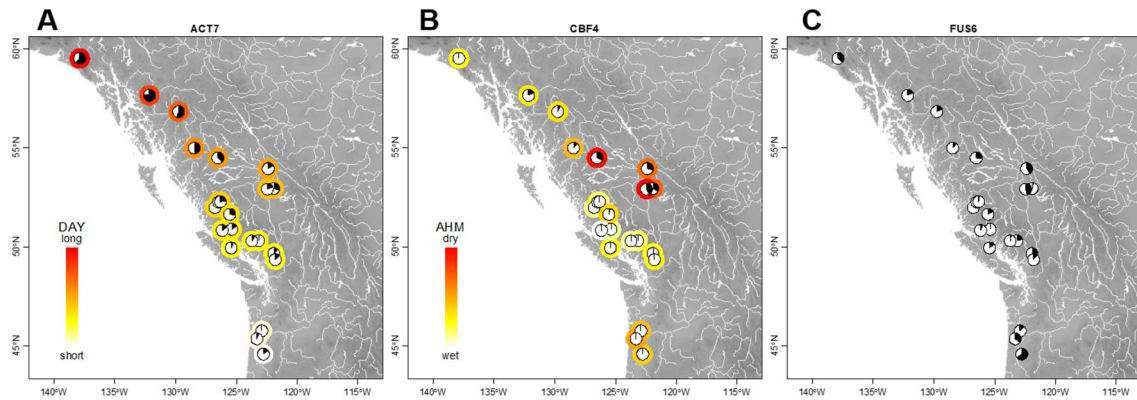

**Figure 6** Values of environmental factors and allele frequencies of differentiated genes superimposed on a geographical map. Pie charts show allele frequencies of genes (black: minor allele; white: major allele). Heat colors are used to illustrate gradients of the environmental factors and traits. (A) Day length (DAY) and a light-response gene (ACT7). (B) Humidity (AHM) and a drought-response gene (CBF4). (C) A gibberellin-response gene (FUS6).



| Original Data |                   |                   |                          |                          |                          |
|---------------|-------------------|-------------------|--------------------------|--------------------------|--------------------------|
|               | E                 | T                 | $G_1$                    | $G_2$                    | $G_3$                    |
| pop1          | $E_{\text{pop1}}$ | $T_{\text{pop1}}$ | $AF_{\text{pop1}}^{G_1}$ | $AF_{\text{pop1}}^{G_2}$ | $AF_{\text{pop1}}^{G_3}$ |
| pop2          | $E_{\text{pop2}}$ | $T_{\text{pop2}}$ | $AF_{\text{pop2}}^{G_1}$ | $AF_{\text{pop2}}^{G_3}$ | $AF_{\text{pop2}}^{G_3}$ |
| pop3          | $E_{\text{pop3}}$ | $T_{\text{pop3}}$ | $AF_{\text{pop3}}^{G_1}$ | $AF_{\text{pop3}}^{G_4}$ | $AF_{\text{pop3}}^{G_3}$ |
| pop4          | $E_{\text{pop4}}$ | $T_{\text{pop4}}$ | $AF_{\text{pop4}}^{G_1}$ | $AF_{\text{pop4}}^{G_5}$ | $AF_{\text{pop4}}^{G_3}$ |

↓

| Distance Data for Graph |                                             |                           |                           |                                   |                                   |                                   |
|-------------------------|---------------------------------------------|---------------------------|---------------------------|-----------------------------------|-----------------------------------|-----------------------------------|
|                         | genome $F_{ST}$                             | E                         | T                         | $G_1$                             | $G_2$                             | $G_3$                             |
| pop1 vs 2               | $F_{ST_{\text{pop1,pop2}}}^{\text{genome}}$ | $d(E_{\text{pop1,pop2}})$ | $d(T_{\text{pop1,pop2}})$ | $F_{ST_{\text{pop1,pop2}}}^{G_1}$ | $F_{ST_{\text{pop1,pop2}}}^{G_2}$ | $F_{ST_{\text{pop1,pop2}}}^{G_3}$ |
| pop1 vs 3               | $F_{ST_{\text{pop1,pop3}}}^{\text{genome}}$ | $d(E_{\text{pop1,pop3}})$ | $d(T_{\text{pop1,pop3}})$ | $F_{ST_{\text{pop1,pop3}}}^{G_1}$ | $F_{ST_{\text{pop1,pop3}}}^{G_2}$ | $F_{ST_{\text{pop1,pop3}}}^{G_3}$ |
| pop1 vs 4               | $F_{ST_{\text{pop1,pop4}}}^{\text{genome}}$ | $d(E_{\text{pop1,pop4}})$ | $d(T_{\text{pop1,pop4}})$ | $F_{ST_{\text{pop1,pop4}}}^{G_1}$ | $F_{ST_{\text{pop1,pop4}}}^{G_2}$ | $F_{ST_{\text{pop1,pop4}}}^{G_3}$ |
| pop2 vs 3               | $F_{ST_{\text{pop2,pop3}}}^{\text{genome}}$ | $d(E_{\text{pop2,pop3}})$ | $d(T_{\text{pop2,pop3}})$ | $F_{ST_{\text{pop2,pop3}}}^{G_1}$ | $F_{ST_{\text{pop2,pop3}}}^{G_2}$ | $F_{ST_{\text{pop2,pop3}}}^{G_3}$ |
| pop2 vs 4               | $F_{ST_{\text{pop2,pop4}}}^{\text{genome}}$ | $d(E_{\text{pop2,pop4}})$ | $d(T_{\text{pop2,pop4}})$ | $F_{ST_{\text{pop2,pop4}}}^{G_1}$ | $F_{ST_{\text{pop2,pop4}}}^{G_2}$ | $F_{ST_{\text{pop2,pop4}}}^{G_3}$ |
| pop3 vs 4               | $F_{ST_{\text{pop3,pop4}}}^{\text{genome}}$ | $d(E_{\text{pop3,pop4}})$ | $d(T_{\text{pop3,pop4}})$ | $F_{ST_{\text{pop3,pop4}}}^{G_1}$ | $F_{ST_{\text{pop3,pop4}}}^{G_2}$ | $F_{ST_{\text{pop3,pop4}}}^{G_3}$ |

**Figure S1** Data matrices. The original dataset is a matrix of environmental factor mean ( $E_i$ ), trait value mean ( $T_i$ ) and minor allele frequency of the  $k$ th gene ( $AF_i^k$ ) in the  $i$ th population. Distance data for our graphical representation consist of a matrix of pairwise genome  $F_{ST}$  ( $F_{ST_{i,j}}^{\text{genome}}$ ), the pairwise difference of environmental factors ( $d(E_i, E_j)$ ), the pairwise difference of trait values ( $d(T_i, T_j)$ ) and pairwise locus  $F_{ST}$  of the  $k$ th gene ( $F_{ST_{i,j}}^k$ ) between  $i$ th and  $j$ th populations.

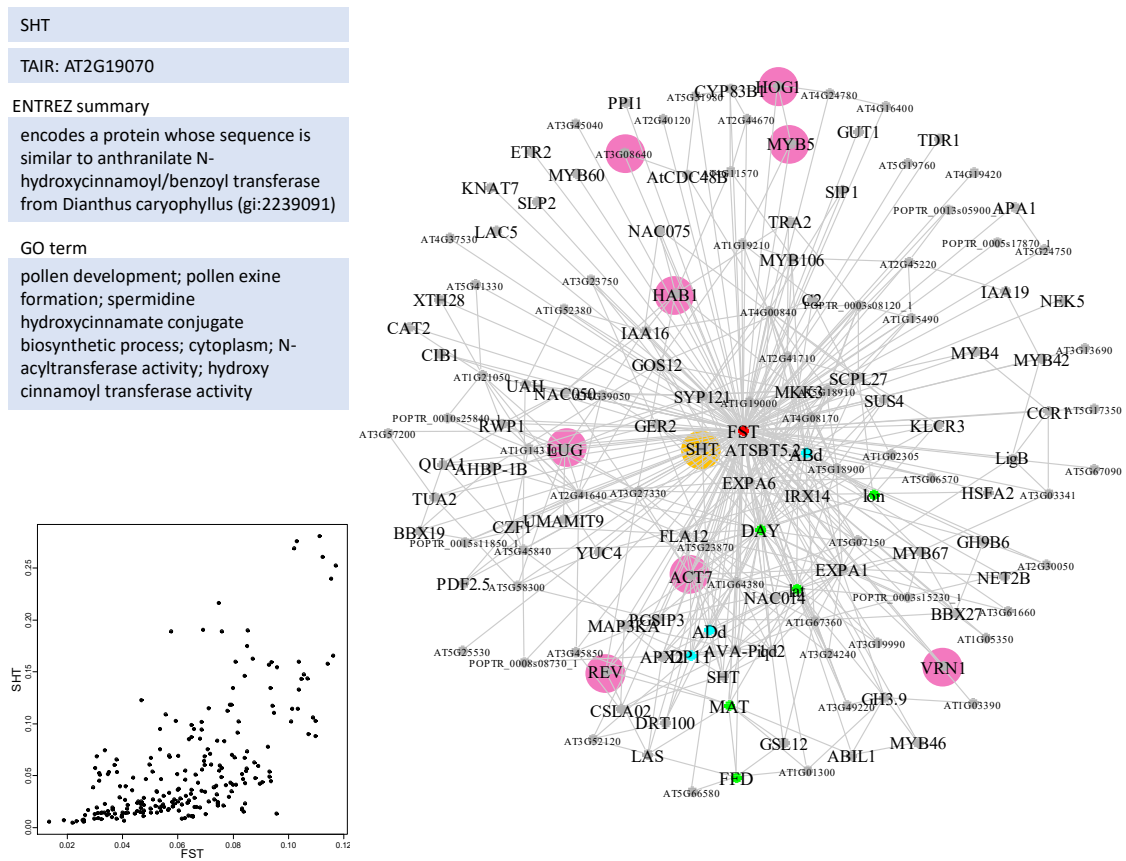

**Figure S2** Radius-one neighborhood of genome  $F_{ST}$ . Any subgraph can be drawn given any subgraph origins, radii and genes. The Entrez summary, GO term and a scatter plot between any two nodes can be shown in the same graph window. SHT, colored in orange, was examined in this example. The scatter plot shows the correlation between genome  $F_{ST}$  and the SHT gene. Genes related to reproduction are colored in pink (see text).

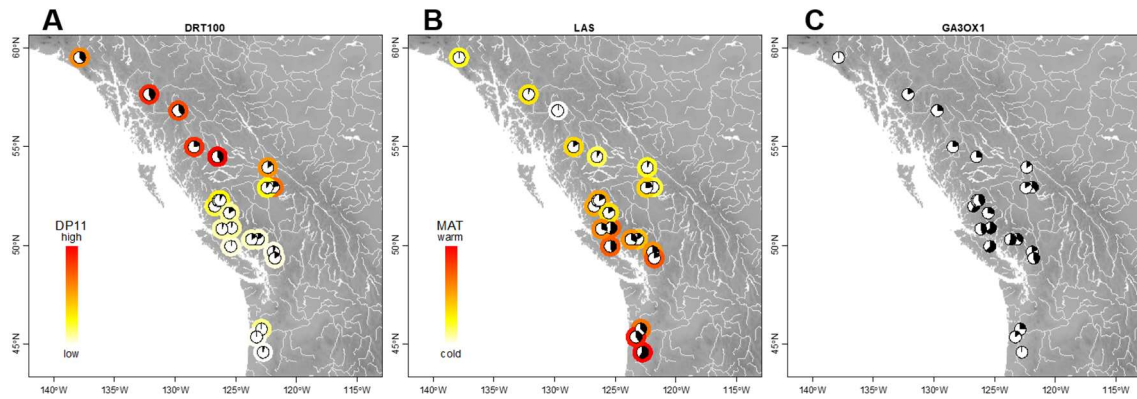

**Figure S3** Values of environmental factors and allele frequencies of differentiated genes superimposed on a geographical map. Pie charts show allele frequencies of genes (black: minor allele; white: major allele). Heat colors are used to display gradients of the environmental factors and traits. (A) Disease progress (DP11) and a DNA repair gene (DRT100). (B) Annual temperature (MAT) and a lateral control gene (LAS). (C) A flower development gene (GA3OX1).

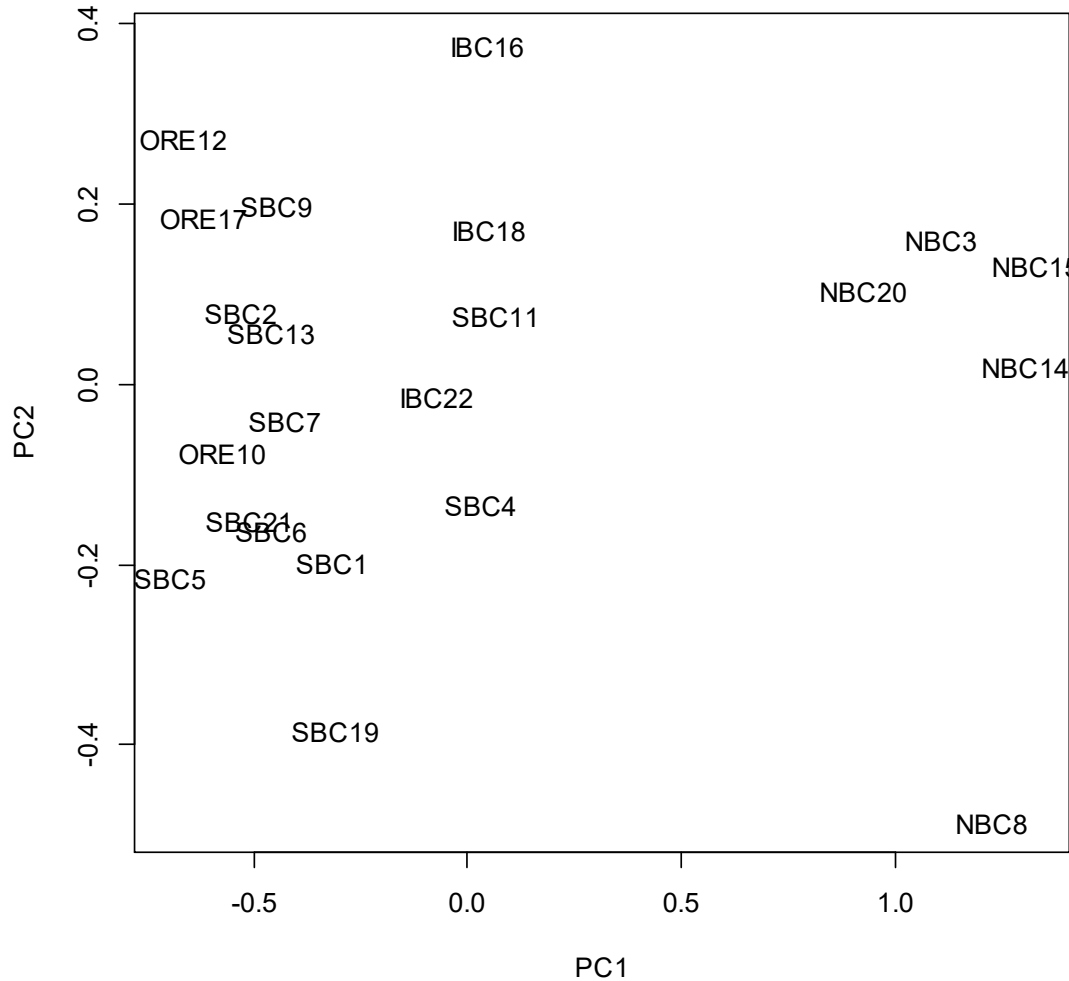

**Figure S4** Principal component analysis plot of genes neighboring adaxial stomata density (ADd) and morbidity (DP10, DP11) in 22 populations of wild poplar. NBC, northern British Columbia; SBC, southern British Columbia; IBC, inland British Columbia; ORE, Oregon.

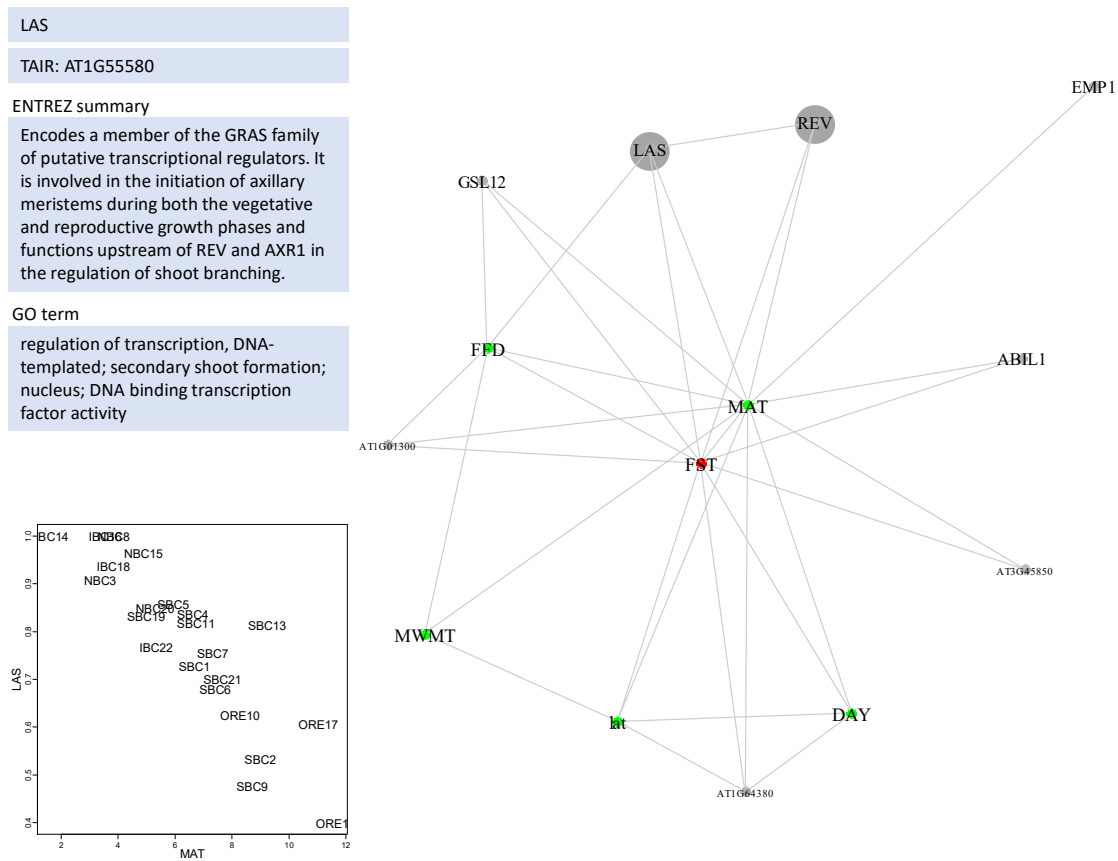

**Figure S5** Radius-one neighborhood of mean annual temperature (MAT). The Entrez summary/GO term for LAS and the scatter plot for MAT and allele frequencies of LAS are shown in the graph window. Genes related to body growth are colored in gray (see text).

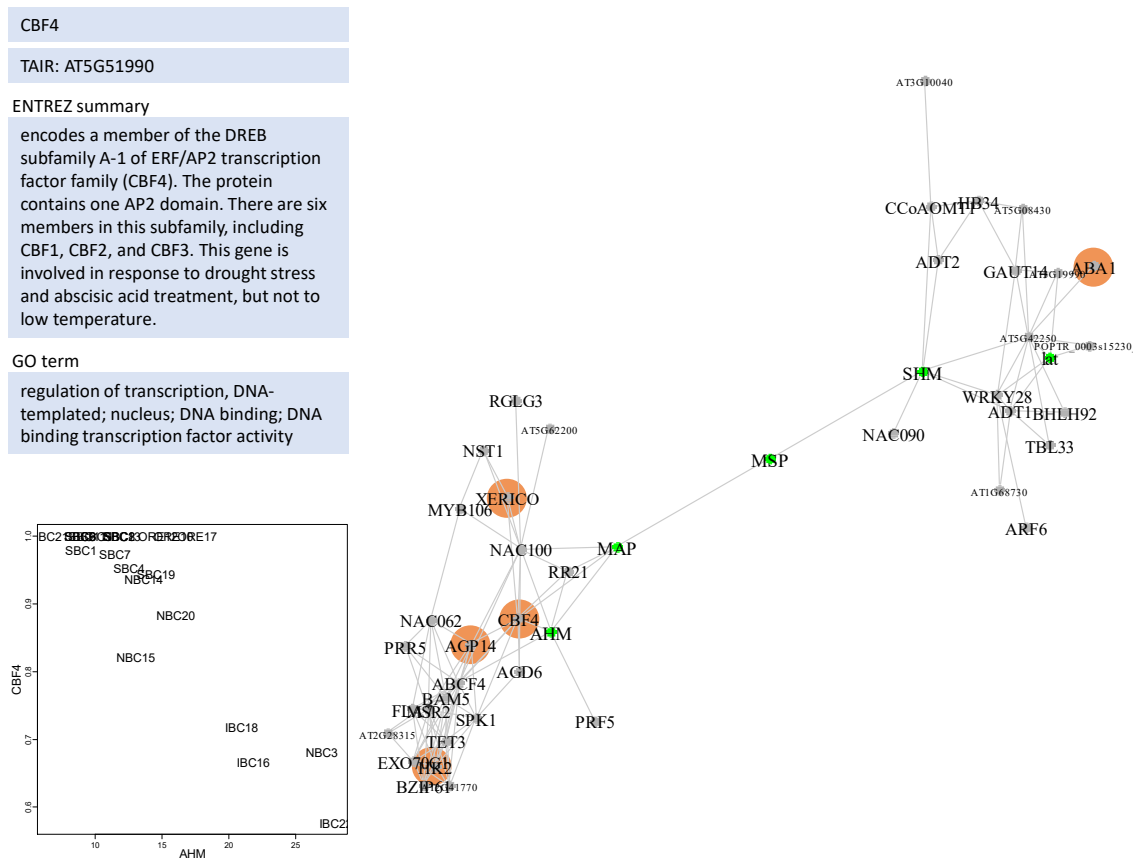

**Figure S6** Neighborhood of precipitation (MAP and MSP) and moisture (AHM and SHM). The Entrez summary/GO term for CBF4, the scatter plot for AHM and allele frequencies of CBF4 are shown. Genes related to drought stress response are colored in brown (see text).

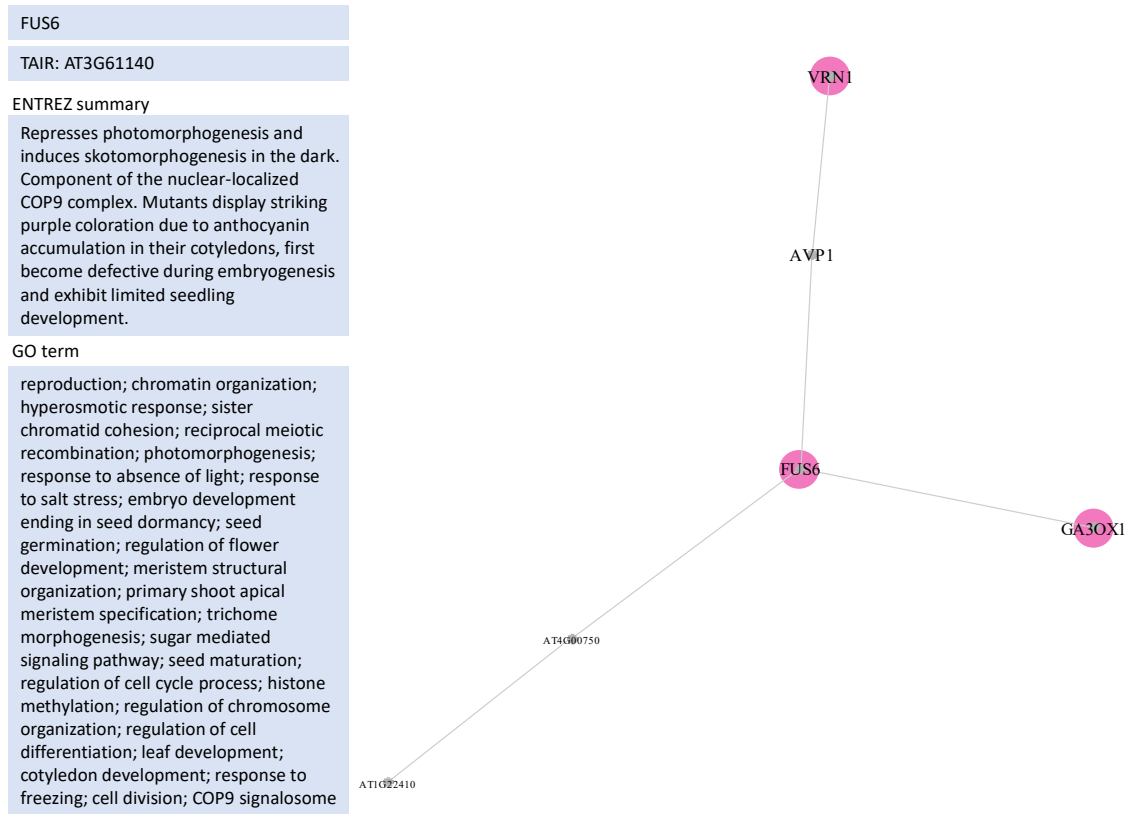

**Figure S7** Isolated cluster of vernalization genes from Figure 2A. The Entrez summary/GO term for FUS6 is shown in the graph window. Genes related to vernalization are colored in pink (see text).
